# Supplementary material for: Machine learning classification can reduce false positives in structure-based virtual screening
Source: PubMed Central journal article supplement — Proc Natl Acad Sci U S A. 2020 Jul 15;117(31):18477–88. doi: 10.1073/pnas.2000585117 (PMC7414157; doi:10.1073/pnas.2000585117), 2020-07-15
Supplement: pnas.2000585117.sapp.pdf [file pnas.2000585117.sapp.pdf]

## Supporting Information

### **Machine learning classification can reduce false positives in structure-based virtual screening**

Yusuf O. Adeshina<sup>1,2</sup>, Eric J. Deeds<sup>2,3</sup>, and John Karanicolas<sup>1\*</sup>

<sup>1</sup>Program in Molecular Therapeutics, Fox Chase Cancer Center, Philadelphia, PA 19111

<sup>2</sup>Center for Computational Biology, <sup>3</sup>Department of Molecular Biosciences,  
University of Kansas, Lawrence, KS 66045

\*To whom correspondence should be addressed.

E-mail: john.karanicolas@fccc.edu

## Supplemental Figures

| <b>Rosetta energies (6)</b>           |  | <b>ChemAxon (4)</b>                               |  | <b>BINANA (13)</b>                      |  |
|---------------------------------------|--|---------------------------------------------------|--|-----------------------------------------|--|
| fa_atr                                |  | fsp3                                              |  | $\alpha$ -helix side chain flexibility  |  |
| fa_rep                                |  | Polar surface area                                |  | $\beta$ -strand side chain flexibility  |  |
| fa_sol                                |  | Van der Waals surface area                        |  | Other side chain flexibility            |  |
| fa_elec                               |  | pienergy                                          |  | $\alpha$ -helix back-bone flexibility   |  |
| hbond_bb_sc                           |  |                                                   |  | $\beta$ -strand back-bone flexibility   |  |
| hbond_sc                              |  |                                                   |  | other back-bone flexibility             |  |
|                                       |  |                                                   |  | Electrostatics                          |  |
|                                       |  |                                                   |  | Number of hydrogen bonds                |  |
|                                       |  |                                                   |  | Hydrophobic contacts                    |  |
|                                       |  |                                                   |  | Pi-pi interaction                       |  |
|                                       |  |                                                   |  | T-stacking                              |  |
|                                       |  |                                                   |  | Pi-cation                               |  |
|                                       |  |                                                   |  | Salt-bridge                             |  |
| <b>Rosetta Struct. Quantities (8)</b> |  | <b>SZYBKI (1)</b>                                 |  | <b>RF-Score (36)</b>                    |  |
| interface_Energy                      |  | Ligand conformational entropy change upon binding |  | Multiple distance-dependent atom counts |  |
| total_BSA                             |  |                                                   |  |                                         |  |
| interface_HB                          |  |                                                   |  |                                         |  |
| total_packstats                       |  |                                                   |  |                                         |  |
| interface_unsat                       |  |                                                   |  |                                         |  |
| total_pose_exposed_SASA               |  |                                                   |  |                                         |  |
| interface_hydrophobic_sasa            |  |                                                   |  |                                         |  |
| interface_polar_sasa                  |  |                                                   |  |                                         |  |

**68 TOTAL  
FEATURES**

**Figure S1: Features incorporated into vScreenML.** These features derive from six sources: Rosetta energy terms, Rosetta structural quantifiers, RF-Score's rfscore\_v1 features, BINANA's analysis of intermolecular contacts, ChemAxon's cxcalc features, OpenEye's SZYBKI conformational entropy term.

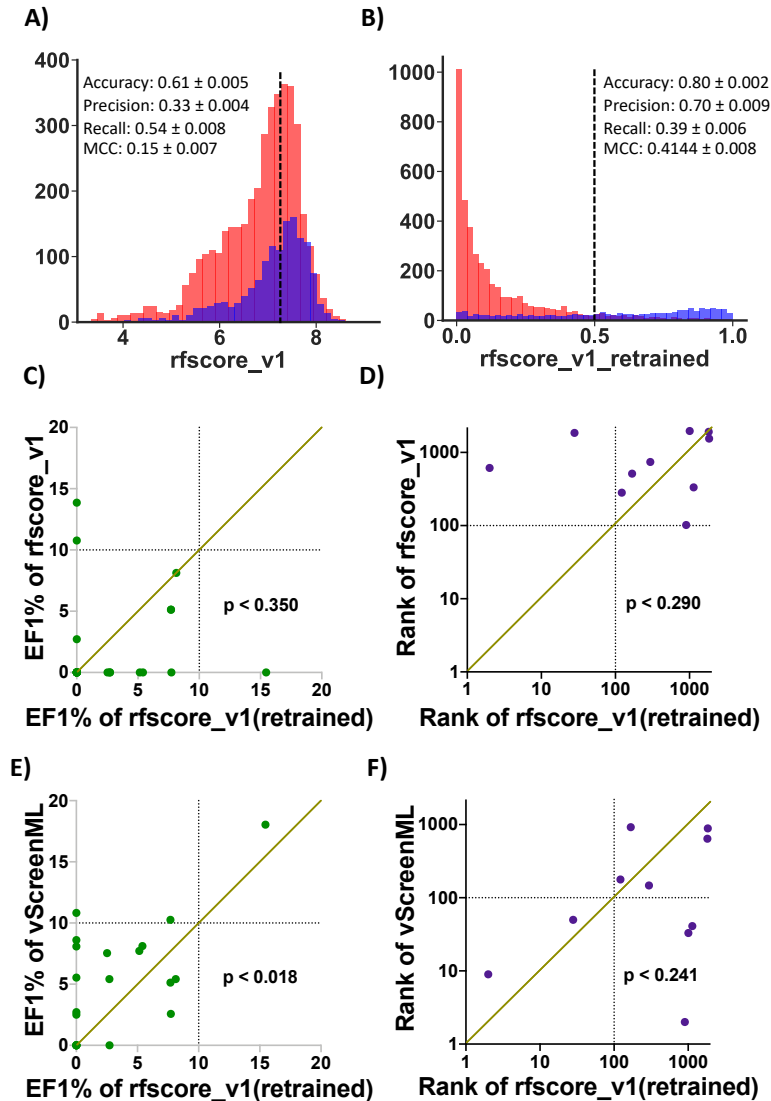

**Figure S2: Retraining rfscore\_v1 using D-COID.** (A) Overlaid histograms for scores obtained when scoring active complexes (*blue*) and decoy complexes (*red*) from D-COID using the original rfscore\_v1. Performance measures are presented as the average of 10 experiments, each of which uses different partitions for 10-fold cross-validation. Uncertainty is presented as 95% confidence intervals.

(B) Overlaid histograms after re-training rfscore\_v1. (C) Comparison of the original and re-weighted versions of rfscore\_v1 applied to the DEKOIS benchmark. (D) Comparison of the original and re-weighted versions of rfscore\_v1 applied to the PPI benchmark. (E) Comparison of re-weighted rfscore\_v1 versus vScreenML on the DEKOIS benchmark. (F) Comparison of re-weighted rfscore\_v1 versus vScreenML on the PPI benchmark. p-values were computed using the two-tailed Wilcoxon Signed-Rank test.

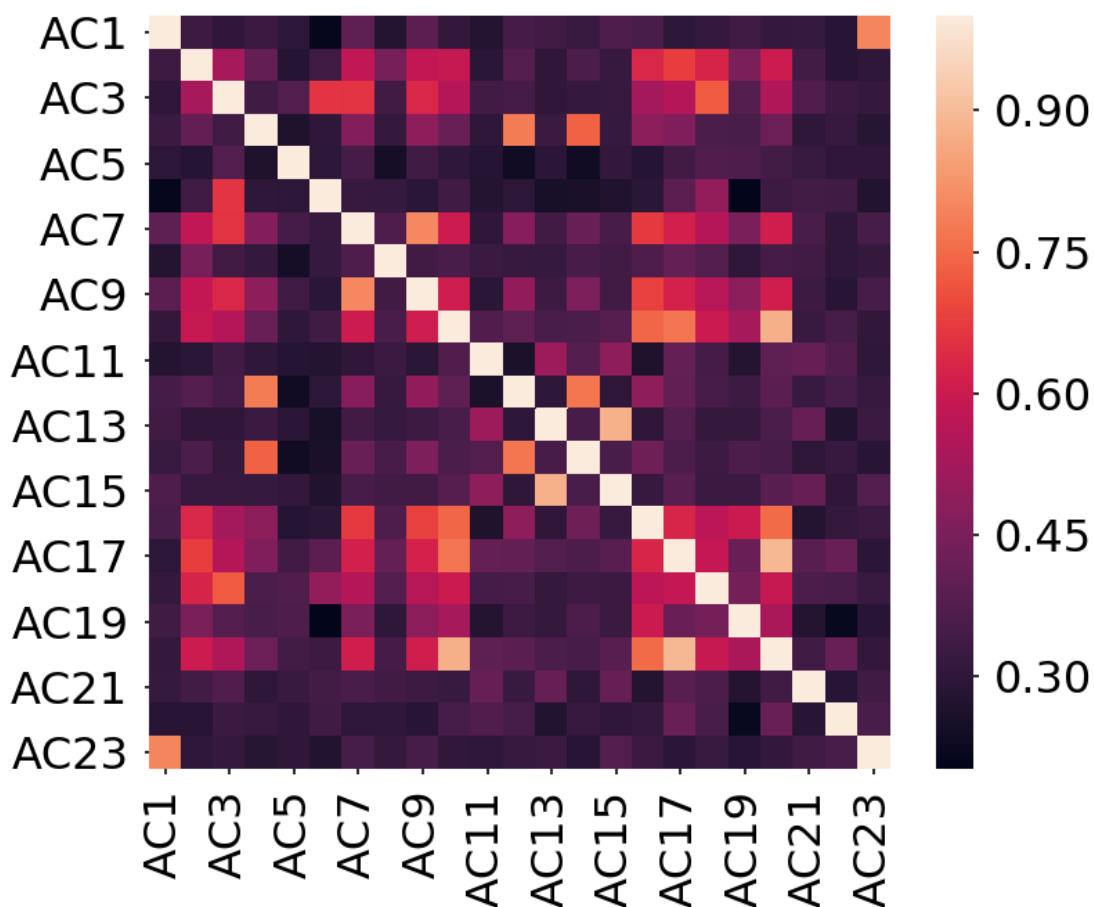

**Figure S3: Heatmap showing similarity between the 23 compounds tested as candidate AChE inhibitors.** All compounds are included in this heatmap, labels include only odd numbers for clarity. Similarity is measured via 2D fingerprints. As highlighted by this analysis, several subsets of these compounds are similar to one another: AC1/AC23 group together, AC3/AC18 group together, AC4/AC12/AC14 group together, AC7/AC9/AC16 group together, AC10/AC16/AC17/AC20 group together, and AC13/AC15 group together. On the other hand, some of these compounds are completely unrelated to any others in this set (e.g., AC5, AC21, AC22). The similarity shown here is also confirmed by visual inspection of the compounds themselves (Table S6).

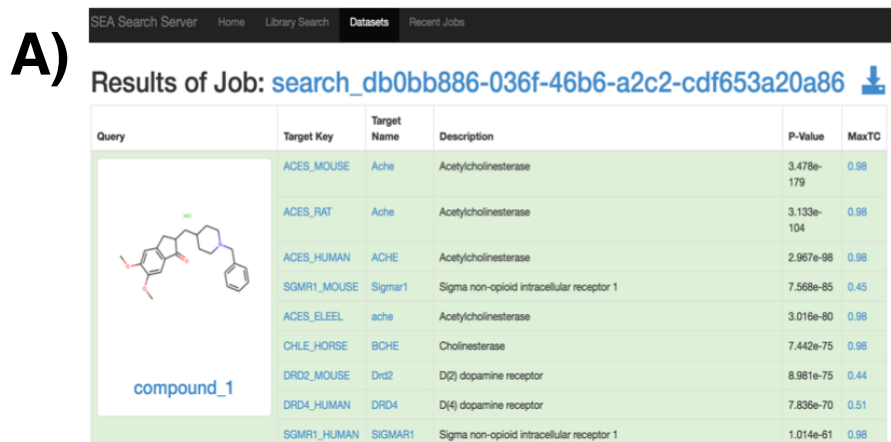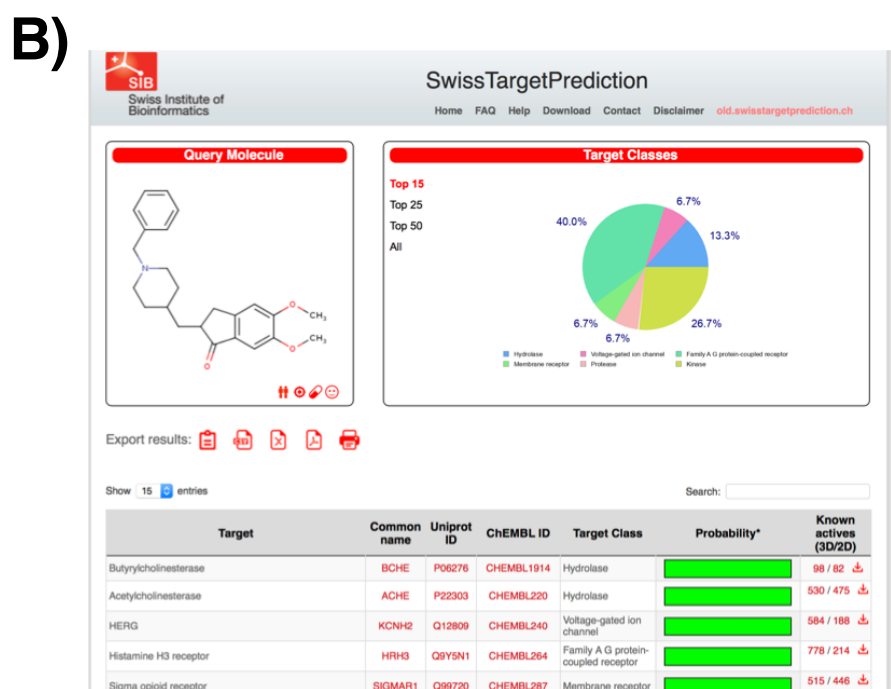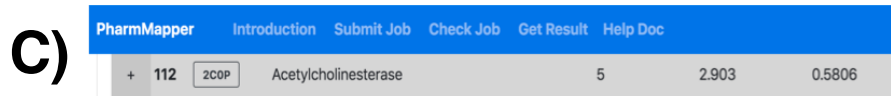

**Figure S4: Positive control for target identification methods.** We confirmed that all three methods would successfully identify AChE as the target of a known AChE inhibitor (donepezil, ChEMBL1678). **(A)** Similarity Ensemble Approach (SEA). **(B)** SwissTargetPrediction. **(C)** PharmMapper. We note that AChE was only ranked #112 among the PharmMapper hits because the 3D conformations it built for donepezil were not sufficiently well-matched to the active conformation to produce a better ranking.

## Supplemental Tables

| Performance measure | Optimized     | Non-optimized |
|---------------------|---------------|---------------|
| Accuracy            | 0.90 ± 0.0022 | 0.89 ± 0.0026 |
| Precision           | 0.89 ± 0.0076 | 0.85 ± 0.0079 |
| Recall              | 0.71 ± 0.0070 | 0.66 ± 0.0081 |
| AUC                 | 0.84 ± 0.0034 | 0.81 ± 0.0042 |
| F1-Score            | 0.79 ± 0.0049 | 0.74 ± 0.0064 |
| MCC                 | 0.74 ± 0.0062 | 0.68 ± 0.0078 |

**Table S1: Effect of hyperparameter tuning on vScreenML.** The performance is shown for the optimized and non-optimized vScreenML models (both use XGBoost, with the complete feature set. Performance measures are presented as the average of 100 trained models, each of which derived from 10-fold cross-validation (see *Methods*). Uncertainty is presented as 95% confidence intervals. In all cases, performance measures were calculated for a subset of the data that was held out from the training step.

| Parameter        | Pre-optimization<br>(default value) | Optimized value |
|------------------|-------------------------------------|-----------------|
| Learning rate    | 0.3                                 | 0.01            |
| Min_child_weight | 1                                   | 1               |
| Max_depth        | 6                                   | 7               |
| Gamma            | 0                                   | 0.1             |
| Subsample        | 1                                   | 0.5             |
| Colsample_bytree | 1                                   | 0.4             |
| Lambda           | 1                                   | Default         |
| Alpha            | 0                                   | Default         |
| Scale_pos_weight | 1                                   | 1               |
| N_estimators     | 100                                 | 1945            |

**Table S2: Results of hyperparameter tuning.** The parameters resulting from optimization for vScreenML are shown.

| Learning scheme                 | Accuracy      | Precision     | Recall        | AUC           | MCC           |
|---------------------------------|---------------|---------------|---------------|---------------|---------------|
| XGBoost                         | 0.89 ± 0.0019 | 0.85 ± 0.0059 | 0.66 ± 0.0052 | 0.81 ± 0.0027 | 0.68 ± 0.0054 |
| Gradient Boosting               | 0.89 ± 0.0024 | 0.85 ± 0.0073 | 0.66 ± 0.0062 | 0.81 ± 0.0034 | 0.68 ± 0.0069 |
| Random Forest                   | 0.86 ± 0.0022 | 0.84 ± 0.0069 | 0.56 ± 0.0071 | 0.76 ± 0.0037 | 0.61 ± 0.0070 |
| Extra Trees                     | 0.86 ± 0.0021 | 0.84 ± 0.0061 | 0.55 ± 0.0074 | 0.76 ± 0.0037 | 0.61 ± 0.0068 |
| Linear Discriminant Analysis    | 0.86 ± 0.0030 | 0.78 ± 0.0089 | 0.62 ± 0.0077 | 0.78 ± 0.0042 | 0.61 ± 0.0087 |
| Quadratic Discriminant Analysis | 0.35 ± 0.0042 | 0.28 ± 0.0014 | 0.98 ± 0.0029 | 0.56 ± 0.0030 | 0.17 ± 0.0064 |
| Gaussian Naïve Bayes            | 0.50 ± 0.0097 | 0.32 ± 0.0038 | 0.90 ± 0.0053 | 0.63 ± 0.0061 | 0.25 ± 0.0097 |
| K-nearest Neighbor (kNN)        | 0.74 ± 0.0018 | 0.45 ± 0.0065 | 0.24 ± 0.0053 | 0.57 ± 0.0025 | 0.18 ± 0.0060 |
| DUMB                            | 0.75          | 0.00          | 0.00          | -             | 0.00          |

**Table S3: Performance from alternate learning schemes.** Using the complete vScreenML feature set, alternate learning schemes were evaluated. Performance measures are presented as the average of 100 trained models, each of which derived from 10-fold cross-validation (see *Methods*). Uncertainty is presented as 95% confidence intervals. In all cases, performance measures were calculated for a subset of the data that was held out from the training step.

| Features                                                        | Accuracy      | Precision     | Recall        | AUC           | MCC           |
|-----------------------------------------------------------------|---------------|---------------|---------------|---------------|---------------|
| Rosetta (reweighted)                                            | 0.85 ± 0.0019 | 0.76 ± 0.0060 | 0.58 ± 0.0093 | 0.76 ± 0.0040 | 0.57 ± 0.0061 |
| RF (reweighted)                                                 | 0.78 ± 0.0021 | 0.65 ± 0.0103 | 0.31 ± 0.0065 | 0.63 ± 0.0032 | 0.34 ± 0.0076 |
| BINANA (reweighted)                                             | 0.83 ± 0.0010 | 0.74 ± 0.0064 | 0.50 ± 0.0046 | 0.72 ± 0.0015 | 0.51 ± 0.0027 |
| LigPro+Szybki+RF+BINANA                                         | 0.86 ± 0.0011 | 0.80 ± 0.0033 | 0.56 ± 0.0063 | 0.76 ± 0.0027 | 0.59 ± 0.0035 |
| Rosetta+NC                                                      | 0.86 ± 0.0025 | 0.80 ± 0.0066 | 0.61 ± 0.0109 | 0.78 ± 0.0050 | 0.61 ± 0.0078 |
| Rosetta+NC+LigPro                                               | 0.86 ± 0.0021 | 0.80 ± 0.0067 | 0.61 ± 0.0090 | 0.78 ± 0.0040 | 0.61 ± 0.0064 |
| Rosetta+NC+LigPro+Szybki                                        | 0.86 ± 0.0021 | 0.79 ± 0.0068 | 0.61 ± 0.0086 | 0.78 ± 0.0039 | 0.61 ± 0.0064 |
| Rosetta+NC+LigPro+Szybki+RF                                     | 0.88 ± 0.0027 | 0.83 ± 0.0081 | 0.66 ± 0.0087 | 0.81 ± 0.0044 | 0.67 ± 0.0081 |
| Rosetta+NC+LigPro+Szybki+BINANA                                 | 0.88 ± 0.0030 | 0.85 ± 0.0064 | 0.62 ± 0.0123 | 0.79 ± 0.0059 | 0.65 ± 0.0092 |
| Rosetta+NC+LigPro+Szybki+RF+BINANA<br>(non-optimized vScreenML) | 0.89 ± 0.0026 | 0.85 ± 0.0079 | 0.66 ± 0.0081 | 0.81 ± 0.0042 | 0.68 ± 0.0078 |

**Table S4: Performance with restricted feature sets.** Examination of models in which all features from a given origin are added/removed en masse; all models are trained using XGBoost. Performance measures are presented as the average of 100 trained models, each of which derived from 10-fold cross-validation (see *Methods*). Uncertainty is presented as 95% confidence intervals. In all cases, performance measures were calculated for a subset of the data that was held out from the training step.



| DEKOIS testcase: PDB (protein name)               | Closest protein in D-COID             | Sequence identity (%) | EF1% from vScreenML |
|---------------------------------------------------|---------------------------------------|-----------------------|---------------------|
| 3hng (VEGFR1)                                     | 4ag8 (VEGFR2)                         | 76.7                  | 10.3                |
| 1hov (MMP-2)                                      | 1xuc (MMP-13)                         | 66.5                  | 2.5                 |
| 3ny9 ( $\beta$ 2 adrenergic receptor)             | 2y00 ( $\beta$ 1 adrenergic receptor) | 65.3                  | 0                   |
| 3kk6 (COX-1)                                      | 3ln0 (COX-2)                          | 64.6                  | 10.8                |
| 1nhz (glucocorticoid receptor)                    | 2zk5 (PPARG)                          | 62.5                  | 5.4                 |
| 1xp0 (PDE5A)                                      | 2jc6 (CAMK1D)                         | 52.4                  | 8.1                 |
| 1z11 (CYP2A6)                                     | 5w0c (CYP2C9)                         | 50.1                  | 0                   |
| 3tfq (corticosteroid 11 $\beta$ -dehydrogenase 1) | 2bpm (CDK2 kinase)                    | 50.0                  | 8.6                 |
| 2oo8 (angiopoietin-1 receptor)                    | 5am6 (FGFR1)                          | 47.1                  | 5.1                 |
| 1b8o (purine nucleoside phosphorylase)            | 3o4v (MTH/SAM nucleosidase)           | 43.5                  | 7.5                 |
| 2w31 (Bcl-2)                                      | 5myg (peregrin bromodomain)           | 42.9                  | 5.5                 |
| 1hw8 (HMG-CoA reductase)                          | 1jla (HIV-1 RT)                       | 42.4                  | 24.6                |
| 2afx (human glutaminyl cyclase)                   | 4f9v (fly glutaminyl cyclase)         | 42.1                  | 0                   |
| 3ewj (TNF-alpha convertase)                       | 1xuc (MMP-13)                         | 39.5                  | 2.7                 |
| 3v8s (ROCK1 kinase)                               | 4nus (Rsk2 kinase)                    | 39.2                  | 18.0                |
| 3eml (adenosine receptor A2a)                     | 5a8e ( $\beta$ 1 adrenergic receptor) | 39.2                  | 7.7                 |
| 2z94 (SARS-CoV protease)                          | 5ccs (cyclophilin D)                  | 37.9                  | 0                   |
| 1uze (angiotensin-converting enzyme ACE)          | 4ag8 (VEGFR2)                         | 34.3                  | 21.4                |
| 3klm (estradiol 17 $\beta$ -dehydrogenase 1)      | 4bo0 (ACP reductase)                  | 29.6                  | 5.4                 |
| 2wcg (glucosylceramidase)                         | 5c8z (zearalenone hydrolase)          | 27.9                  | 2.6                 |
| 1w4r (thymidine kinase)                           | 3zv9 (enterovirus 3C protease)        | 25.4                  | 0                   |
| 1r4l (angiotensin-converting enzyme ACE2)         | 4wnp (ULK1 kinase)                    | 23.3                  | 8.1                 |
| 1uou (thymidine phosphorylase)                    | 3wmc ( $\beta$ -GlcNAcase)            | 21.7                  | 0                   |

**Table S5: Similarity of proteins in DEKOIS benchmark to training set.** The complete DEKOIS set comprises 81 proteins. Some were present in our D-COID training set as well, and were therefore excluded when we carried out the benchmark experiment. For each of 23 protein targets included in our benchmark, we present the closest protein present in our D-COID training set (on the basis of sequence identity). The EF1% values listed here correspond to those presented in **Figure 3a** (zeros correspond to cases in which none of the active compounds were ranked in the top 1%). The fact that vScreenML does not exhibit superior performance when a closer protein homolog is available suggests that its performance does not rely on identifying a related protein homolog in the training set.

| Compound | Structure | SMILES string                                                                            |
|----------|-----------|------------------------------------------------------------------------------------------|
| AC1      |           | <chem>COC=1C=CC=C2NC=C(C(C)C)C=3C=CC(=CC3)N4C=NC=N4)C12</chem>                           |
| AC2      |           | <chem>CN1N=C(C=C1NC(=O)C=2C=NC=C(C2)C=3C=CC(Cl)=CC3)C(C)(C)C</chem>                      |
| AC3      |           | <chem>CC=1C=CC=C(C1)C=2C=NC=C(C2)C(=O)NC3=NC(=CS3)C4CCNCC4</chem>                        |
| AC4      |           | <chem>FC=1C=CC(NC=2C=CC(NC(=O)C=3C=NC(Cl)=CN3)=C4C=NC=CC24)=CC1</chem>                   |
| AC5      |           | <chem>CC1=NC=2C(=CC=CC2N1)C3=NOC(=N3)C=4C=NC=C(N4)N5CCCC5</chem>                         |
| AC6      |           | <chem>ClC1=C(NC=2C=CC(Cl)=CC12)C(=O)NC3=NC(=CS3)C4CCNCC4</chem>                          |
| AC7      |           | <chem>CC=1C=CC=C(C1)C=2C=NC=C(C2)C(=O)NC=3C=CC=4N=CNC4C3</chem>                          |
| AC8      |           | <chem>CC1=CC(=NN1C=2C=C(C)C=C(C)C2)C(=O)N3C[C@H]([C@@H](C3)C=4C=CC(Cl)=CC4)C(=O)O</chem> |
| AC9      |           | <chem>CC=1C=CC=C(C1)C=2C=NC=C(C2)C(=O)NC=3C=CC(=CC3)C4=CNC=N4</chem>                     |
| AC10     |           | <chem>CN(C)C=1C=CC(=CC1)C=2C=NC=C(C2)C(=O)NC=3C=NC=4CCC(N)CC4C3</chem>                   |

|      |  |                                                                                     |
|------|--|-------------------------------------------------------------------------------------|
| AC11 |  | <chem>O=C(NCC1CCCC=2C=CC=NC12)N3CCC4=C(C3)N=NN4C=5C=CC=CC5</chem>                   |
| AC12 |  | <chem>NC(=O)C1=CNC(=C1)C(=O)NC=2C=CC(NC=3C=CC(F)=CC3)=C4C=CN=CC24</chem>            |
| AC13 |  | <chem>O=C(CC1=NOC=2C=CC=CC12)N3CCC4=C(C3)N=CN4CCC=5C=CC=CC5</chem>                  |
| AC14 |  | <chem>NC(=O)C1=CC(=NN1C=2C=CC=CC2)C(=O)NC=3C=CC(NC=4C=CC(F)=CC4)=C5C=CN=CC35</chem> |
| AC15 |  | <chem>COC=1C=CC=2ON=C(CC(=O)N3CCC4=C(C3)N=CN4CCC=5C=CC=CC5)C2C1</chem>              |
| AC16 |  | <chem>CN(C)C=1C=CC(=CC1)C=2C=NC=C(C2)C(=O)NC=3C=CC(F)=C(C)C3</chem>                 |
| AC17 |  | <chem>C1C=1C=CC(=CC1)C=2C=NC=C(C2)C(=O)NC=3C=NC=4CCCCC4C3</chem>                    |
| AC18 |  | <chem>CC=1C=CC(=CC1)C=2C=NC=C(C2)C(=O)NC3=NC(=NN3C)C4CCNCC4</chem>                  |
| AC19 |  | <chem>CN(C)C=1C=CC(=CC1)C=2C=NC=C(C2)C3=NN=C(O3)C4=C(C)N=C5C=CC=CN45</chem>         |

|      |                                                                                   |                                                                     |
|------|-----------------------------------------------------------------------------------|---------------------------------------------------------------------|
| AC20 | 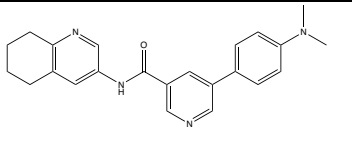 | <chem>CN(C)C=1C=CC(=CC1)C=2C=NC=C(C2)C(=O)NC=3C=NC=4CCCCC4C3</chem> |
| AC21 |  | <chem>CC1=NC=2C(=CC=CC2N1)C3=NOC(=N3)C=4C=NC=C(N4)N5CCCC5</chem>    |
| AC22 |  | <chem>CC(N1CCCC(NC(=O)C2=CC=3CCCCC3NC2=O)C1=O)C=4C=CC(F)=CC4</chem> |
| AC23 |  | <chem>COC=1C=CC=C2NC=C(CCNC(C)C=3C=CC(=CC3)N4CCNC4=O)C12</chem>     |

**Table S6: Compounds tested as candidate AChE inhibitors.** Chemical structures and SMILES strings are presented for each of the 23 compounds selected by vScreenML as a candidate AChE inhibitor.

| Compound             | rfscore_v1   | rfscore_v2  | rfscore_v3  | nnscore     | PLEClinear  | PLECnn      | PLECrf      | rfscore_VS  |
|----------------------|--------------|-------------|-------------|-------------|-------------|-------------|-------------|-------------|
| AC1                  | 18711        | 14707       | 16971       | 10184       | 484         | 3590        | 8779        | 12311       |
| AC10                 | 13709        | 8242        | 9480        | 17452       | 8671        | 2186        | 724         | 9336        |
| AC11                 | 8815         | 5095        | 6460        | 1371        | 10659       | 10432       | 5159        | 7553        |
| AC14                 | 3081         | 248         | 1871        | 540         | 2663        | 3188        | 5583        | 6253        |
| AC17                 | 15601        | 12686       | 15651       | 14166       | 10370       | 4883        | 4967        | 10158       |
| AC19                 | 11425        | 8951        | 8250        | 15378       | 5732        | 480         | 8448        | 9842        |
| AC21                 | 5699         | 12409       | 7174        | 6435        | 4992        | 3012        | 168         | 10310       |
| AC22                 | 1595         | 948         | 137         | 1401        | 12695       | 11360       | 6603        | 4391        |
| AC23                 | 15335        | 11442       | 15529       | 7018        | 1044        | 3520        | 7056        | 5809        |
| AC6                  | 4938         | 1049        | 4610        | 14151       | 16169       | 15061       | 3204        | 17445       |
| AC8                  | 6085         | 3317        | 1331        | 5377        | 6781        | 4983        | 3518        | 1877        |
| AC9                  | 18334        | 8948        | 16295       | 4917        | 5288        | 980         | 14428       | 14319       |
| <b>Average rank:</b> | <b>10277</b> | <b>7337</b> | <b>8647</b> | <b>8199</b> | <b>7129</b> | <b>5306</b> | <b>5720</b> | <b>9134</b> |

**Table S7: Ranking of first-round compounds selected by vScreenML by other methods.** Using each of the scoring functions methods evaluated in this study, we ranked the 20,000 docked models from the first round of AChE screening (corresponding data is not shown for the second round of screening, because at that point already vScreenML had been used to focus the search). Because we did not explicitly test the compounds selected by these other methods, we cannot say whether these other compounds are true AChE inhibitors that were missed by vScreenML. However, because none of these methods assign favorable (low) ranking to the same compounds selected by vScreenML (the compounds presented in this table), we can conclude that the particular compounds selected by vScreenML would not have been selected by these other methods.

| Compound | Structure                                                                           | Closest analog in D-COID                                                                                                                                                                     |
|----------|-------------------------------------------------------------------------------------|----------------------------------------------------------------------------------------------------------------------------------------------------------------------------------------------|
| AC1      | 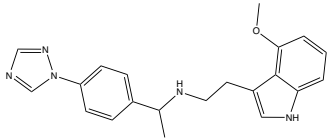   |  <p data-bbox="1011 499 1149 531">4p1r (2KR)</p> <p data-bbox="943 569 1219 600">Phosphodiesterase 10A</p> |
| AC2      |    |  <p data-bbox="1008 751 1157 783">1kv1 (BMU)</p> <p data-bbox="984 821 1182 852">p38 MAP kinase</p>        |
| AC3      |   |  <p data-bbox="1011 1031 1149 1062">4djx (0KQ)</p> <p data-bbox="984 1100 1177 1131">Beta-secretase 1</p>  |
| AC4      |  |  <p data-bbox="1008 1339 1154 1371">3pe1 (3NG)</p> <p data-bbox="1008 1409 1154 1440">CK2 kinase</p>     |
| AC5      |  |  <p data-bbox="1016 1619 1146 1650">2xj2 (985)</p> <p data-bbox="1003 1688 1159 1719">Pim-1 kinase</p>   |

|      |                                                                                     |                                                                                                                        |
|------|-------------------------------------------------------------------------------------|------------------------------------------------------------------------------------------------------------------------|
| AC6  | 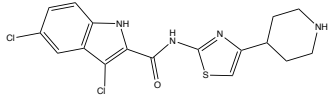   |  <p>2vu3 (LZE)<br/>CDK2 kinase</p>   |
| AC7  |    |  <p>514q (LKB)<br/>AAK1 kinase</p>   |
| AC8  |   |  <p>1g9v (RQ3)<br/>Hemoglobin</p>    |
| AC9  |  |  <p>514q (LKB)<br/>AAK1 kinase</p> |
| AC10 |  |  <p>2qoh (P3Y)<br/>Abl kinase</p>  |

|             |                                                                                     |                                                                                                                                     |
|-------------|-------------------------------------------------------------------------------------|-------------------------------------------------------------------------------------------------------------------------------------|
| <p>AC11</p> | 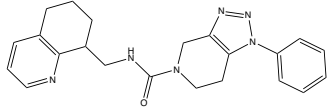   |  <p>4deh (0JK)<br/>c-Met kinase</p>               |
| <p>AC12</p> |    |  <p>2vto (LZ8)<br/>CDK2 kinase</p>                |
| <p>AC13</p> |   |  <p>4psq (2WL)<br/>Retinol-binding protein 4</p> |
| <p>AC14</p> |  |  <p>2vto (LZ8)<br/>CDK2 kinase</p>              |



|      |                                                                                     |                                                                                                                            |
|------|-------------------------------------------------------------------------------------|----------------------------------------------------------------------------------------------------------------------------|
| AC15 | 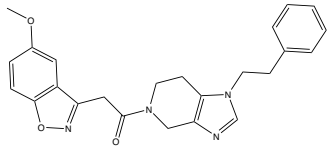   |  <p>2zec (11N)<br/>Tryptase beta 2</p>   |
| AC16 |    |  <p>514q (LKB)<br/>AAK1 kinase</p>       |
| AC17 |   |  <p>514q (LKB)<br/>AAK1 kinase</p>       |
| AC18 |  |  <p>4k0y (10A)<br/>Pim-1 kinase</p>    |
| AC19 |  |  <p>3gb2 (G3B)<br/>GSK3beta kinase</p> |

|      |                                                                                     |                                                                                                                                       |
|------|-------------------------------------------------------------------------------------|---------------------------------------------------------------------------------------------------------------------------------------|
| AC20 | 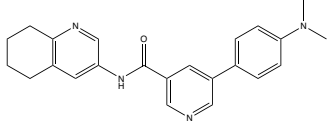   |  <p>2qoh (P3Y)</p> <p>Abl kinase</p>                |
| AC21 |    |  <p>4psq (2WL)</p> <p>Retinol-binding protein 4</p> |
| AC22 |    |  <p>3ki6 (G9L)</p> <p>Cholix toxin</p>              |
| AC23 |  |  <p>4buw (F33)</p> <p>Tankyrase-2</p>             |

**Table S8: Similarity of compounds selected by vScreenML to D-COVID set.** For each compound selected by vScreenML as a candidate AChE inhibitor, we show the closest compound from D-COVID (used in training vScreenML). In each case, the PDB and ligand ID are shown, along with the protein to which this ligand was bound in the solved structure. None of these compounds come from complexes with proteins related to AChE, ruling out any concern that vScreenML might have recognized some subtle features of the binding sites from proteins related to AChE.

| Compound | SEA predictions                                                                                                                                                                                                                            | SwissTarget predictions                                                                                                                                                                        |
|----------|--------------------------------------------------------------------------------------------------------------------------------------------------------------------------------------------------------------------------------------------|------------------------------------------------------------------------------------------------------------------------------------------------------------------------------------------------|
| AC1      | Peptidyl-prolyl cis-trans isomerase B<br>Kinesin-like protein KIF20A<br>5-hydroxytryptamine receptor 1B<br>5-hydroxytryptamine receptor 1D<br>Apelin receptor                                                                              | Serotonin receptor<br>Tyrosine-protein kinase (JAK1 and JAK2)<br>CaM kinase II<br>Calcium sensing receptor<br>Glutamate [NMDA] receptor                                                        |
| AC2      | Sodium channel protein type 10 subunit alpha<br>Sodium channel protein type 2 subunit alpha<br>Stromal interaction molecule 1<br>Luciferin 4-monoxygenase<br>Mitogen-activated protein kinase kinase kinase 5                              | Phosphodiesterase 5A<br>Histone deacetylase 6<br>Serotonin 2a (5-HT2a) receptor<br>P2X purinoceptor 7<br>Acetyl-CoA carboxylase 2                                                              |
| AC3      | Thrombopoietin receptor<br>GMP synthase [glutamine-hydrolyzing]<br>Sodium channel protein type 10 subunit alpha<br>Atypical chemokine receptor 3<br>Mas-related G-protein coupled receptor member X1                                       | Melanin-concentrating hormone receptor 1<br>Rho-associated protein kinase 2<br>Cyclin-dependent kinase 4<br>Serine/threonine-protein kinase Aurora-A<br>Monoamine oxidase B                    |
| AC4      | Beta-secretase 2<br>Metabotropic glutamate receptor 4<br>Beta-secretase 1<br>Arachidonate 15-lipoxygenase<br>Metabotropic glutamate receptor 4                                                                                             | Focal adhesion kinase 1<br>Tyrosine-protein kinase SRC<br>Quinone reductase 2<br>Adenosine A1 receptor<br>Adenosine A2a receptor                                                               |
| AC5      | Serine/threonine-protein kinase pim-2<br>Serine/threonine-protein kinase pim-3<br>Calcium-activated potassium channel subunit alpha-1<br>Serine/threonine-protein kinase pim-1                                                             | DGAT1 protein<br>Cholecystokinin B receptor<br>Adenosine A1 receptor<br>Adenosine A3 receptor<br>Neurokinin 3 receptor                                                                         |
| AC6      | Glycogen phosphorylase, liver form<br>Trace amine-associated receptor 1<br>NAD-dependent protein deacetylase HST2<br>Thrombopoietin receptor<br>Glycogen phosphorylase, muscle form                                                        | Phosphodiesterase 5A<br>Cyclin-dependent kinase 7<br>Protein kinase C theta<br>Urotensin II receptor<br>Melanin-concentrating hormone receptor 1                                               |
| AC7      | Potassium channel subfamily K member 9<br>NAD-dependent protein deacetylase sirtuin-3, mitochondrial<br>NAD-dependent protein deacetylase sirtuin-2<br>Sodium channel protein type 10 subunit alpha<br>Amine oxidase [flavin-containing] B | Melanin-concentrating hormone receptor 1<br>Sodium channel protein type X alpha subunit<br>Microtubule-associated protein tau<br>Alpha-synuclein<br>Cyclin-dependent kinase 5/CDK5 activator 1 |

|      |                                                                                                                                                                                                                                                                |                                                                                                                                                                                                            |
|------|----------------------------------------------------------------------------------------------------------------------------------------------------------------------------------------------------------------------------------------------------------------|------------------------------------------------------------------------------------------------------------------------------------------------------------------------------------------------------------|
| AC8  | <p>Melanocortin receptor 4</p> <p>Transporter</p> <p>Replication protein A 70 kDa DNA-binding subunit</p> <p>Sodium-dependent dopamine transporter</p> <p>Sodium-dependent serotonin transporter</p>                                                           | <p>Lysosomal protective protein</p> <p>Thromboxane A2 receptor</p> <p>Prostanoid DP receptor</p> <p>Prostanoid EP4 receptor</p> <p>Prostanoid EP2 receptor</p>                                             |
| AC9  | <p>Sodium channel protein type 10 subunit alpha</p> <p>NAD-dependent protein deacetylase sirtuin-3, mitochondrial</p> <p>Potassium channel subfamily K member 9</p> <p>Tyrosine-protein kinase ABL1</p> <p>NAD-dependent protein deacetylase sirtuin-2</p>     | <p>Sodium channel protein type X alpha subunit</p> <p>Histone deacetylase 1</p> <p>Melanin-concentrating hormone receptor 1</p> <p>Tyrosine-protein kinase SRC</p> <p>Anandamide amidohydrolase</p>        |
| AC10 | <p>Sodium channel protein type 10 subunit alpha</p> <p>Tyrosine-protein kinase ABL1</p> <p>Melanin-concentrating hormone receptor 1</p> <p>NAD-dependent protein deacetylase sirtuin-3, mitochondrial</p> <p>5-hydroxytryptamine receptor 1D</p>               | <p>Tyrosine-protein kinase SYK</p> <p>Protein kinase C mu</p> <p>Serine/threonine-protein kinase D2</p> <p>Tyrosine-protein kinase ZAP-70</p> <p>Cyclin T1</p>                                             |
| AC11 | <p>C-X-C chemokine receptor type 4</p> <p>Envelope glycoprotein gp160</p> <p>P2X purinoceptor 7</p> <p>Nicotinamide phosphoribosyltransferase</p> <p>Serine/threonine-protein kinase TA03</p>                                                                  | <p>Fatty acid synthase</p> <p>Vasopressin V2 receptor</p> <p>Oxytocin receptor</p> <p>Cathepsin K</p> <p>Phosphodiesterase 7A</p>                                                                          |
| AC12 | <p>NAD-dependent protein deacetylase sirtuin-3, mitochondrial</p> <p>NAD-dependent protein deacetylase sirtuin-2</p> <p>Platelet-derived growth factor receptor alpha</p> <p>Nucleosome-remodeling factor subunit BPTF</p> <p>Arachidonate 15-lipoxygenase</p> | <p>Cyclooxygenase-2</p> <p>15-hydroxyprostaglandin dehydrogenase [NAD+]</p> <p>Urokinase-type plasminogen activator</p> <p>Serine/threonine-protein kinase Chk2</p> <p>Heat shock protein HSP 90-alpha</p> |
| AC13 | <p>CCR4-NOT transcription complex subunit 7</p> <p>Endothelial lipase</p> <p>5-hydroxytryptamine receptor 5A</p> <p>G-protein coupled receptor 183</p> <p>Enoyl-[acyl-carrier-protein] reductase [NADH] FabI</p>                                               | <p>Melatonin receptor 1A</p> <p>Epoxide hydratase</p> <p>Proteinase activated receptor 4</p> <p>ATP-binding cassette sub-family G member 2</p> <p>MAP kinase p38 alpha</p>                                 |
| AC14 | <p>High affinity nerve growth factor receptor</p> <p>Metabotropic glutamate receptor 4</p> <p>Signal transducer and activator of transcription 6</p> <p>Ketohexokinase</p> <p>Metabotropic glutamate receptor 4</p>                                            | <p>Neuropeptide Y receptor type 5</p> <p>Thrombin and coagulation factor X</p> <p>Tyrosine-protein kinase JAK3</p> <p>Dihydroorotate dehydrogenase</p> <p>Thrombin</p>                                     |

|      |                                                                                                                                                                                                                               |                                                                                                                                                                                        |
|------|-------------------------------------------------------------------------------------------------------------------------------------------------------------------------------------------------------------------------------|----------------------------------------------------------------------------------------------------------------------------------------------------------------------------------------|
| AC15 | Beta-1,4-mannosyl-glycoprotein 4-beta-N-acetylglucosaminyltransferase<br>Ryanodine receptor 2<br>Melatonin receptor type 1A<br>Melatonin receptor type 1B<br>G-protein coupled receptor 183                                   | Melatonin receptor 1A<br>Melatonin receptor 1B<br>Cathepsin K<br>Cathepsin S<br>MAP kinase-activated protein kinase 2                                                                  |
| AC16 | Sodium channel protein type 10 subunit alpha<br>Tyrosine-protein kinase ABL1<br>NAD-dependent protein deacetylase sirtuin-3, mitochondrial<br>Sodium channel protein type 10 subunit alpha<br>5-hydroxytryptamine receptor 1D | Phospholipase A2 group IIA<br>Dual specificity phosphatase Cdc25B<br>Phospholipase D1<br>Adenosine A1 receptor<br>Acyl coenzyme A:cholesterol acyltransferase 1                        |
| AC17 | Sodium channel protein type 10 subunit alpha<br>Sodium channel protein type 2 subunit alpha<br>Ubiquitin carboxyl-terminal hydrolase BAP1<br>Luciferin 4-monooxygenase<br>Melanin-concentrating hormone receptor 1            | Potassium channel subfamily K member 3<br>Cannabinoid receptor 1<br>Fibroblast growth factor receptor 1<br>Dopamine D4 receptor<br>Epoxide hydratase                                   |
| AC18 | Sodium channel protein type 10 subunit alpha<br>Cell division protein FtsZ<br>Sodium channel protein type 10 subunit alpha<br>Atypical chemokine receptor 3<br>ATPase family AAA domain-containing protein 2                  | Serine/threonine-protein kinase PIM1<br>Inhibitor of nuclear factor kappa B kinase beta subunit<br>Prokineticin receptor 1<br>WD repeat-containing protein 5<br>Protein kinase C delta |
| AC19 | Pantothenate synthetase<br>DNA repair protein RAD51 homolog 1<br>Apoptosis regulator BAX<br>Luciferin 4-monooxygenase                                                                                                         | Histone deacetylase 1<br>Beta-secretase 1<br>Hepatocyte growth factor receptor<br>Cathepsin D<br>Histone deacetylase 2                                                                 |
| AC20 | Sodium channel protein type 10 subunit alpha<br>Melanin-concentrating hormone receptor 1<br>Cytochrome P450 11B2, mitochondrial<br>5-hydroxytryptamine receptor 1D<br>Follicle-stimulating hormone receptor                   | TGF-beta receptor type I<br>Protein tyrosine kinase 2 beta<br>Sterol regulatory element-binding protein 2<br>Nuclear receptor ROR-gamma<br>Cathepsin K                                 |
| AC21 | 5-hydroxytryptamine receptor 3A<br>Histamine N-methyltransferase<br>Histidine-rich protein PFHRP-II<br>5-hydroxytryptamine receptor 2A<br>Transforming protein RhoA                                                           | Vascular endothelial growth factor receptor 2<br>Proteasome Macropain subunit MB1<br>Prolyl endopeptidase<br>Fibroblast activation protein alpha<br>Proto-oncogene protein Wnt-3       |

|      |                                                                                                                                                                                                               |                                                                                                                                                                              |
|------|---------------------------------------------------------------------------------------------------------------------------------------------------------------------------------------------------------------|------------------------------------------------------------------------------------------------------------------------------------------------------------------------------|
| AC22 | 3 beta-hydroxysteroid dehydrogenase/Delta 5-->4-<br>isomerase type 2<br>Histone lysine demethylase PHF8<br>Lysine-specific demethylase 2B<br>Taste receptor type 1 member 2<br>Taste receptor type 1 member 3 | Cannabinoid receptor 1<br>Cannabinoid receptor 2<br>Mu opioid receptor<br>Kappa Opioid receptor<br>Opioid growth factor receptor-like protein 1                              |
| AC23 | Substance-P receptor<br>Peptidyl-prolyl cis-trans isomerase B<br>Kinesin-like protein KIF20A<br>5-hydroxytryptamine receptor 1B<br>5-hydroxytryptamine receptor 1D                                            | Mu opioid receptor<br>Advanced glycosylation end product-specific receptor<br>Inhibitor of apoptosis protein 3<br>Purinergic receptor P2Y1<br>Serotonin 3a (5-HT3a) receptor |

**Table S9: Activity predictions for candidate AChE inhibitors.** Predicted activity of the compounds selected by vScreenML, from SEA and SwissTarget. Neither recognizes these compounds as AChE inhibitors, suggesting that indeed these are new scaffolds for this target.

| vScreenML compound                                                                                                           | Closest matches amongst annotated AChE inhibitors in ChEMBL                                                                                                                                                                                                                      |
|------------------------------------------------------------------------------------------------------------------------------|----------------------------------------------------------------------------------------------------------------------------------------------------------------------------------------------------------------------------------------------------------------------------------|
| 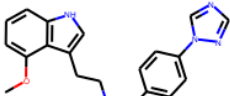 <p data-bbox="550 533 597 558">AC1</p>     |  <p data-bbox="906 447 1096 472">CHEMBL1491339</p>  <p data-bbox="943 590 1058 615">CHEMBL45</p>             |
|  <p data-bbox="550 842 597 867">AC2</p>     |  <p data-bbox="922 737 1089 762">CHEMBL94113</p>  <p data-bbox="906 888 1096 913">CHEMBL2104675</p>          |
|  <p data-bbox="550 1161 597 1186">AC3</p> |  <p data-bbox="906 1083 1096 1108">CHEMBL2105485</p>  <p data-bbox="906 1230 1096 1255">CHEMBL2107681</p> |
|  <p data-bbox="550 1503 597 1528">AC4</p> |  <p data-bbox="906 1409 1096 1434">CHEMBL1213257</p>  <p data-bbox="922 1581 1084 1606">CHEMBL21333</p>  |

|                                                                                                |                                                                                                                                                                                                                    |
|------------------------------------------------------------------------------------------------|--------------------------------------------------------------------------------------------------------------------------------------------------------------------------------------------------------------------|
| 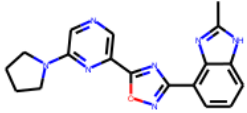 <p>AC5</p>   |  <p>CHEMBL66648</p>  <p>CHEMBL29404</p>        |
|  <p>AC6</p>   |  <p>CHEMBL2104597</p>  <p>CHEMBL2104675</p>    |
|  <p>AC7</p>  |  <p>CHEMBL1491339</p>  <p>CHEMBL218166</p>   |
|  <p>AC8</p> |  <p>CHEMBL2106056</p>  <p>CHEMBL348763</p> |



|                                                                                                 |                                                                                                                                                                                                                   |
|-------------------------------------------------------------------------------------------------|-------------------------------------------------------------------------------------------------------------------------------------------------------------------------------------------------------------------|
| 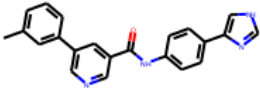 <p>AC9</p>    |  <p>CHEMBL21333</p>  <p>CHEMBL569424</p>      |
|  <p>AC10</p>   |  <p>CHEMBL61872</p>  <p>CHEMBL3137304</p>     |
|  <p>AC11</p> |  <p>CHEMBL75013</p>  <p>CHEMBL27926</p>    |
|  <p>AC12</p> |  <p>CHEMBL1491339</p>  <p>CHEMBL21333</p> |

|                                                                                                 |                                                                                                                                                                                                                    |
|-------------------------------------------------------------------------------------------------|--------------------------------------------------------------------------------------------------------------------------------------------------------------------------------------------------------------------|
| 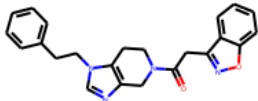 <p>AC13</p>   |  <p>CHEMBL1625607</p>  <p>CHEMBL1076256</p>    |
|  <p>AC14</p>   |  <p>CHEMBL21333</p>  <p>CHEMBL2105169</p>      |
|  <p>AC15</p> |  <p>CHEMBL2104050</p>  <p>CHEMBL359570</p> |
|  <p>AC16</p> |  <p>CHEMBL2107052</p>  <p>CHEMBL459265</p> |

|                                                                                                 |                                                                                                                                                                                                                     |
|-------------------------------------------------------------------------------------------------|---------------------------------------------------------------------------------------------------------------------------------------------------------------------------------------------------------------------|
| 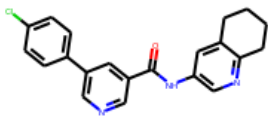 <p>AC17</p>   |  <p>CHEMBL91397</p>  <p>CHEMBL1213257</p>       |
|  <p>AC18</p>   |  <p>CHEMBL315838</p>  <p>CHEMBL2104902</p>      |
|  <p>AC19</p> |  <p>CHEMBL492399</p>  <p>CHEMBL94113</p>     |
|  <p>AC20</p> |  <p>CHEMBL1591365</p>  <p>CHEMBL2105583</p> |
|  <p>AC21</p> |  <p>CHEMBL1076256</p>  <p>CHEMBL2110792</p> |

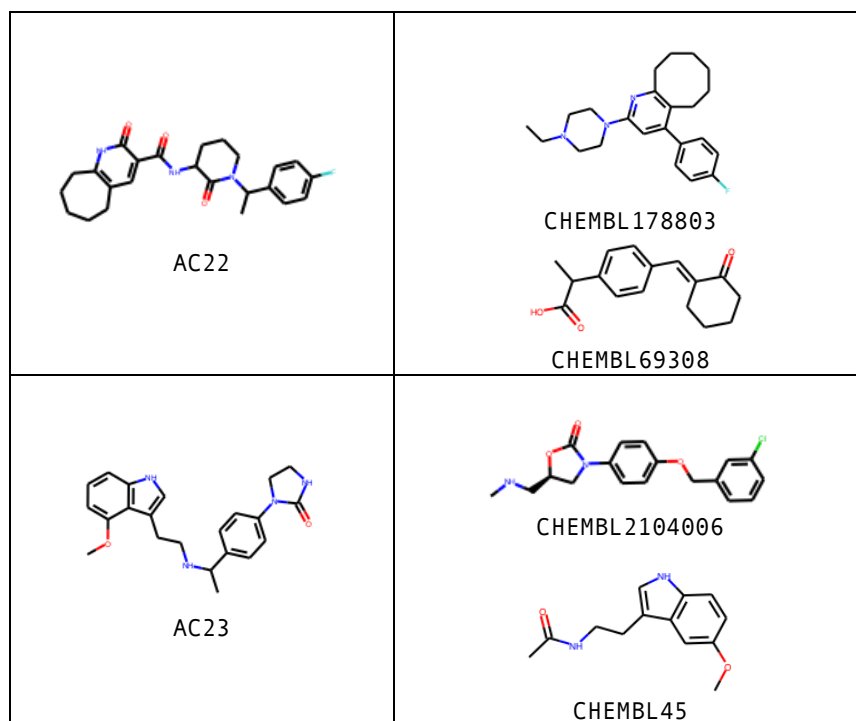

**Table S10: Comparison of vScreenML's candidate AChE inhibitors to known AChE inhibitors.** For each compound selected by vScreenML as a candidate AChE inhibitor, we present the two closest compounds (as measured by 2D fingerprint similarity) that are annotated in ChEMBL as AChE inhibitors. The lack of similarity implies that these compounds would not have been identified as AChE inhibitors on the basis of 2D fingerprint similarity.

| Compound | Identified as a top-scoring hit |
|----------|---------------------------------|
| AC6      | 1 <sup>st</sup> round           |
| AC3      | 1 <sup>st</sup> round           |
| AC10     | Both rounds                     |
| AC11     | 1 <sup>st</sup> round           |
| AC15     | 2 <sup>nd</sup> round           |
| AC5      | 2 <sup>nd</sup> round           |
| AC13     | 2 <sup>nd</sup> round           |
| AC19     | Both rounds                     |
| AC23     | 1 <sup>st</sup> round           |
| AC9      | Both rounds                     |

**Table S11: Provenance of AChE inhibitors.** For each of the 10 AChE inhibitors that provided more than 50% inhibition at a concentration of 50  $\mu$ M, we determined at what stage this compound was prioritized for testing. Our strategy included two stages of screening: first we screened only 15 million diverse compounds from the Enamine collection, then we expanded our search by collecting analogs for each of these hits. We note that 7 of these 10 compounds were identified in the first round of screening; after re-refinement in the second round, 3 of these were still highly-ranked whereas 4 had been surpassed by analogs (or received lower scores upon re-refinement). Only 3 of these 10 compounds would have been missed if our screening had been limited to a single round of 15 million compounds.
